# Supplementary material
Source: PubMed Central journal article supplement (PMC6791738)
Supplement: NIHMS1527406-supplement-Supplemental_Digital_Content_1.pdf [file NIHMS1527406-supplement-Supplemental_Digital_Content_1.pdf]

## Supplemental Digital Content 1

### EWS 2.0 First Survey

Thank you for your prompt patient evaluation in response to the EWS alert. We ask you to complete the brief survey below so we can best understand your impressions and actions. Thank you!

#### ALERT AND RESPONDENT DETAILS

1. Date of Alert

2. Hospital

☐ HUP

☐ PPMC

3. Patient Last Name

4. Your Profession

☐ Nurse

☐ Intern

☐ Resident (PGY2 and above)

☐ Advanced practice provider

☐ Fellow

☐ Attending

5. Your Email

6. Date and time currently completing this survey (click "Now")

#### PRE-ALERT vs. POST-ALERT IMPRESSION

7. Compared to my assessment of this patient PRIOR to the alert, my CURRENT assessment revealed

☐ A new finding (symptoms, vital sign, exam, or lab)

☐ No new finding

*If "A new finding" selected:*

7A. The new finding(s) include:

☐ New patient symptom

☐ New vital sign finding

☐ New physical exam finding

☐ New laboratory finding

8. Compared to my assessment of this patient PRIOR to the alert, my CURRENT assessment can be summarized as:

☐ I'm UNCHANGED IN MY EXPECTATION that this patient may become critically ill.

☐ I'm UNCHANGED IN MY EXPECTATION that this patient may become critically ill.

☐ I have an INCREASED EXPECTATION that this patient will become critically ill.

☐ I think this patient is NEWLY critically ill

☐ I think this patient REMAINS critically ill as they were PRIOR to the alert.

☐ I think this patient REMAINS critically ill BUT IS PROGRESSING in severity compared to PRIOR to the alert.

## TESTING AND INTERVENTIONS BASED ON ALERT

|                                               |                                                                                                                                                                     |                                                                                                                                                                                                                                                                                                                                                                                                                                                                                                                                                                      |
|-----------------------------------------------|---------------------------------------------------------------------------------------------------------------------------------------------------------------------|----------------------------------------------------------------------------------------------------------------------------------------------------------------------------------------------------------------------------------------------------------------------------------------------------------------------------------------------------------------------------------------------------------------------------------------------------------------------------------------------------------------------------------------------------------------------|
| 9.                                            | Did the alert and subsequent evaluation of the patient change your management?                                                                                      | <input type="radio"/> YES (examples: rounding frequency, monitoring, tests, interventions)<br><input type="radio"/> NO, it did NOT change management                                                                                                                                                                                                                                                                                                                                                                                                                 |
| 10.                                           | How did (or will) your management of this patient change as a result of the alert and subsequent evaluation of the patient? (Choose the statements that most apply) | <input type="radio"/> More frequent bedside assessments<br><input type="radio"/> More frequent vital sign checks<br><input type="radio"/> New diagnostic testing (including labs, imaging, diagnostic procedures)<br><input type="radio"/> New intervention(s) (including meds, therapeutic procedures, consults)<br><input type="radio"/> Consideration of new diagnosis<br><input type="radio"/> Goals of care discussion<br><input type="radio"/> Rapid response/code/anesthesia stat<br><input type="radio"/> ICU transfer<br><input type="radio"/> Other: _____ |
| <i>If "New diagnostic testing" selected:</i>  |                                                                                                                                                                     |                                                                                                                                                                                                                                                                                                                                                                                                                                                                                                                                                                      |
| 10A.                                          | Which test(s) did the alert prompt you to order?                                                                                                                    | <input type="radio"/> Laboratory Test<br><input type="radio"/> Imaging Test<br><input type="radio"/> Diagnostic Procedure (invasive and non-invasive including EKG)                                                                                                                                                                                                                                                                                                                                                                                                  |
| 10B.                                          | I ordered the previously described test(s) because: Select all that apply.                                                                                          | <input type="radio"/> The test(s)/procedures(s) were clinically indicated.<br><input type="radio"/> I felt obligated because the alert triggered.                                                                                                                                                                                                                                                                                                                                                                                                                    |
| <i>If "New intervention(s)" selected:</i>     |                                                                                                                                                                     |                                                                                                                                                                                                                                                                                                                                                                                                                                                                                                                                                                      |
| 10C.                                          | Which new intervention did the alert prompt you to perform?                                                                                                         | <input type="radio"/> Administration of fluids or transfusions<br><input type="radio"/> Modified respiratory support (ex. O2 delivery, nebs, non-invasive ventilation, intubation)<br><input type="radio"/> Medication<br><input type="radio"/> Therapeutic invasive procedure<br><input type="radio"/> Specialist consultation<br><input type="radio"/> Other: _____                                                                                                                                                                                                |
| <i>If "Medication" selected:</i>              |                                                                                                                                                                     |                                                                                                                                                                                                                                                                                                                                                                                                                                                                                                                                                                      |
| 10C-1.                                        | Did your medication change involve ANTIBIOTICS?                                                                                                                     | <input type="radio"/> Patient NOT GIVEN Antibiotics.<br><input type="radio"/> Patient continues on SAME Antibiotics.<br><input type="radio"/> NEW Antibiotic(s), NONE PREVIOUSLY given<br><input type="radio"/> NEW Antibiotic(s), CHANGED/ADDED to BROADEN coverage                                                                                                                                                                                                                                                                                                 |
| <i>If "Specialist consultation" selected:</i> |                                                                                                                                                                     |                                                                                                                                                                                                                                                                                                                                                                                                                                                                                                                                                                      |
| 10C-2.                                        | Consultation to specialist type                                                                                                                                     | <input type="radio"/> Cardiology<br><input type="radio"/> Infectious Disease<br><input type="radio"/> Surgery<br><input type="radio"/> Other: _____                                                                                                                                                                                                                                                                                                                                                                                                                  |
| 10D.                                          | I ordered the previously described intervention(s) because: Select all that apply.                                                                                  | <input type="radio"/> The intervention(s) were clinically indicated.<br><input type="radio"/> I felt obligated because the alert triggered.                                                                                                                                                                                                                                                                                                                                                                                                                          |

|                                                                                                  |                                                                                                                                                                                                                                                                                                                                                                                                                                                                                                                                                                                                                                                                                                                                                                                                                                       |
|--------------------------------------------------------------------------------------------------|---------------------------------------------------------------------------------------------------------------------------------------------------------------------------------------------------------------------------------------------------------------------------------------------------------------------------------------------------------------------------------------------------------------------------------------------------------------------------------------------------------------------------------------------------------------------------------------------------------------------------------------------------------------------------------------------------------------------------------------------------------------------------------------------------------------------------------------|
| 11. BEFORE you received the alert, did you think that this patient had sepsis?                   | <input type="radio"/> NO<br><input type="radio"/> MAYBE, it was on my differential<br><input type="radio"/> YES                                                                                                                                                                                                                                                                                                                                                                                                                                                                                                                                                                                                                                                                                                                       |
| 12. AFTER you received the alert, do you think that this patient has sepsis?                     | <input type="radio"/> NO<br><input type="radio"/> MAYBE<br><input type="radio"/> YES, sepsis WITHOUT end organ dysfunction<br><input type="radio"/> YES, sepsis WITH end organ dysfunction BUT NOT in shock<br><input type="radio"/> YES, sepsis WITH shock                                                                                                                                                                                                                                                                                                                                                                                                                                                                                                                                                                           |
| 13. Was the alert helpful?                                                                       | <input type="radio"/> YES, the alert was VERY HELPFUL<br><input type="radio"/> YES, the alert was HELPFUL<br><input type="radio"/> The alert was NEITHER helpful nor unhelpful.<br><input type="radio"/> NO, the alert was UNHELPFUL<br><input type="radio"/> NO, the alert was VERY UNHELPFUL                                                                                                                                                                                                                                                                                                                                                                                                                                                                                                                                        |
| 14. How would you characterize the impact of the alert on your patient's care?                   | <input type="radio"/> DEFINITELY IMPROVED care<br><input type="radio"/> PROBABLY IMPROVED care<br><input type="radio"/> MAYBE improved care<br><input type="radio"/> PROBABLY DID NOT improve care<br><input type="radio"/> DEFINITELY DID NOT improve care                                                                                                                                                                                                                                                                                                                                                                                                                                                                                                                                                                           |
| 15. Which of the following was THE MOST likely diagnosis to explain the triggering of the alert? | <input type="radio"/> Sepsis<br><input type="radio"/> Advanced cancer without apparent sepsis<br><input type="radio"/> Dehydration/volume depletion<br><input type="radio"/> Bleed<br><input type="radio"/> Arrhythmia (tachy or brady)<br><input type="radio"/> Pulmonary embolism<br><input type="radio"/> Drug effect<br><input type="radio"/> Pain or anxiety<br><input type="radio"/> Cardiogenic shock<br><input type="radio"/> Progression of end stage lung disease<br><input type="radio"/> Post-operative state<br><input type="radio"/> Other<br><input type="radio"/> I don't know why the alert triggered since this patient seems unchanged clinically<br><input type="radio"/> The alert identified a clinical change in this patient but I don't know what the new diagnosis is<br><input type="radio"/> Other: _____ |
| 16. What changes, if any, would you recommend to the EWS alert?                                  | _____                                                                                                                                                                                                                                                                                                                                                                                                                                                                                                                                                                                                                                                                                                                                                                                                                                 |
