# Supplementary material
Source: PubMed Central journal article supplement (PMC6791738)
Supplement: NIHMS1527406-supplement-Supplemental_Digital_Content_2.pdf [file NIHMS1527406-supplement-Supplemental_Digital_Content_2.pdf]

## Supplemental Digital Content 2

### EWS 2.0 Second Survey

We are seeking to understand your impressions of the EWS alert and patient condition at 48 hours after the alert fired. Please complete the brief survey below. Thank you!

#### ALERT AND RESPONDENT DETAILS

|    |                                                                                                                        |                                                                                                                                                                                                                                                                                                                                     |
|----|------------------------------------------------------------------------------------------------------------------------|-------------------------------------------------------------------------------------------------------------------------------------------------------------------------------------------------------------------------------------------------------------------------------------------------------------------------------------|
| 1. | Patient Last Name                                                                                                      | _____                                                                                                                                                                                                                                                                                                                               |
| 2. | Hospital                                                                                                               | <input type="radio"/> HUP<br><input type="radio"/> PPMC                                                                                                                                                                                                                                                                             |
| 3. | Date of Initial Alert                                                                                                  | _____                                                                                                                                                                                                                                                                                                                               |
| 4. | Regarding your involvement in this patient's care since the alert triggered, select the statement you most agree with: | <input type="radio"/> I am still caring for this patient.<br><input type="radio"/> I am no longer caring for this patient, but am aware of their clinical course since the alert triggered.<br><input type="radio"/> I am no longer caring for this patient, and cannot comment on their clinical course since the alert triggered. |
| 5. | Your Profession                                                                                                        | <input type="radio"/> Nurse<br><input type="radio"/> Intern<br><input type="radio"/> Resident (PGY2 and above)<br><input type="radio"/> Advanced practice provider<br><input type="radio"/> Fellow<br><input type="radio"/> Attending                                                                                               |
| 6. | Your Email                                                                                                             | _____                                                                                                                                                                                                                                                                                                                               |
| 7. | Date and time currently completing this survey                                                                         | _____                                                                                                                                                                                                                                                                                                                               |

#### CURRENT IMPRESSION OF PATIENT CONDITION

|    |                                                                                     |                                                                                                                                                                                                                                                                                                                                                                                                                                                                                                                                                                                                                                                                                                                                                             |
|----|-------------------------------------------------------------------------------------|-------------------------------------------------------------------------------------------------------------------------------------------------------------------------------------------------------------------------------------------------------------------------------------------------------------------------------------------------------------------------------------------------------------------------------------------------------------------------------------------------------------------------------------------------------------------------------------------------------------------------------------------------------------------------------------------------------------------------------------------------------------|
| 8. | Compared to my assessment of this patient immediately after the alert, I NOW think: | <input type="radio"/> The patient is UNCHANGED clinically and UNLIKELY to develop critical illness in the short term.<br><input type="radio"/> The patient is UNCHANGED clinically and REMAINS LIKELY to develop critical illness in the short term.<br><input type="radio"/> The patient has CHANGED clinically and I have an INCREASED EXPECTATION that this patient will become critically ill.<br><input type="radio"/> I think this patient is NEWLY critically ill.<br><input type="radio"/> I think this patient REMAINS critically ill as they were at the time the alert first triggered.<br><input type="radio"/> I think this patient REMAINS critically ill AND IS PROGRESSING in severity compared to the time when the alert first triggered. |
|----|-------------------------------------------------------------------------------------|-------------------------------------------------------------------------------------------------------------------------------------------------------------------------------------------------------------------------------------------------------------------------------------------------------------------------------------------------------------------------------------------------------------------------------------------------------------------------------------------------------------------------------------------------------------------------------------------------------------------------------------------------------------------------------------------------------------------------------------------------------------|

- 
- |                                                   |                                                                                                                                                                                                                                                                                                                    |
|---------------------------------------------------|--------------------------------------------------------------------------------------------------------------------------------------------------------------------------------------------------------------------------------------------------------------------------------------------------------------------|
| 9. Do you think that this patient now has sepsis? | <input type="radio"/> NO<br><input type="radio"/> MAYBE, I remain unsure, but it is on my differential.<br><input type="radio"/> YES, sepsis WITHOUT end organ dysfunction<br><input type="radio"/> YES, sepsis WITH end organ dysfunction BUT NOT in shock<br><input type="radio"/> YES, sepsis WITH septic shock |
|---------------------------------------------------|--------------------------------------------------------------------------------------------------------------------------------------------------------------------------------------------------------------------------------------------------------------------------------------------------------------------|
- 
- |                                                                                        |                                                                                                                                                                                                                                                                                                                                                                                                                                                                                                                                                                                                                                                                                                                                                                                                        |
|----------------------------------------------------------------------------------------|--------------------------------------------------------------------------------------------------------------------------------------------------------------------------------------------------------------------------------------------------------------------------------------------------------------------------------------------------------------------------------------------------------------------------------------------------------------------------------------------------------------------------------------------------------------------------------------------------------------------------------------------------------------------------------------------------------------------------------------------------------------------------------------------------------|
| 10. In retrospect, what was THE MOST likely diagnosis to explain the alert triggering? | <input type="radio"/> Sepsis<br><input type="radio"/> Advanced cancer without apparent sepsis<br><input type="radio"/> Dehydration/volume depletion<br><input type="radio"/> Bleed<br><input type="radio"/> Arrhythmia (tachy or brady)<br><input type="radio"/> Pulmonary embolism<br><input type="radio"/> Drug effect<br><input type="radio"/> Pain or anxiety<br><input type="radio"/> Cardiogenic shock<br><input type="radio"/> Progression of end stage lung disease<br><input type="radio"/> Post-operative state<br><input type="radio"/> Other: _____<br><input type="radio"/> I don't know why the alert triggered since this patient seems unchanged clinically<br><input type="radio"/> The alert identified a clinical change in this patient but I don't know what the new diagnosis is |
|----------------------------------------------------------------------------------------|--------------------------------------------------------------------------------------------------------------------------------------------------------------------------------------------------------------------------------------------------------------------------------------------------------------------------------------------------------------------------------------------------------------------------------------------------------------------------------------------------------------------------------------------------------------------------------------------------------------------------------------------------------------------------------------------------------------------------------------------------------------------------------------------------------|
- 

## IMPRESSION OF THE ALERT

- 
- |                                                                                                   |                                                       |
|---------------------------------------------------------------------------------------------------|-------------------------------------------------------|
| 11. Did you communicate about the triggering of the alert to the next covering provider or nurse? | <input type="radio"/> Yes<br><input type="radio"/> No |
|---------------------------------------------------------------------------------------------------|-------------------------------------------------------|
- 
- If "Yes" selected:*
- |                                                                                        |                                                                                                                                                                                                                                                                               |
|----------------------------------------------------------------------------------------|-------------------------------------------------------------------------------------------------------------------------------------------------------------------------------------------------------------------------------------------------------------------------------|
| 11A. How did you communicate about the triggering of the alert? Select all that apply. | <input type="radio"/> Verbal signout/report<br><input type="radio"/> Written signout/report<br><input type="radio"/> Using Carealign*<br><input type="radio"/> During morning rounds<br><input type="radio"/> A note in the paper chart<br><input type="radio"/> Other: _____ |
|----------------------------------------------------------------------------------------|-------------------------------------------------------------------------------------------------------------------------------------------------------------------------------------------------------------------------------------------------------------------------------|
- 
- |                                                                                                                                         |                                                                                                                                                                                                                                                                                                                                          |
|-----------------------------------------------------------------------------------------------------------------------------------------|------------------------------------------------------------------------------------------------------------------------------------------------------------------------------------------------------------------------------------------------------------------------------------------------------------------------------------------|
| 12. Given the patient's clinical course since the alert, do you NOW agree or disagree with this statement: "The EWS alert was helpful." | <input type="radio"/> Strongly agree: the alert was VERY HELPFUL<br><input type="radio"/> Agree: the alert was HELPFUL<br><input type="radio"/> Neutral: the alert was NEITHER helpful nor unhelpful<br><input type="radio"/> Disagree: the alert was UNHELPFUL<br><input type="radio"/> Strongly disagree: the alert was VERY UNHELPFUL |
|-----------------------------------------------------------------------------------------------------------------------------------------|------------------------------------------------------------------------------------------------------------------------------------------------------------------------------------------------------------------------------------------------------------------------------------------------------------------------------------------|
-

---

*If "Strongly agree" or "Agree" selected:*

- 12A. Select the reason(s) why the alert was HELPFUL. Select all that apply.
- ☐ Prompted improved COMMUNICATION among this patient's providers
  - ☐ Prompted MONITORING more closely
  - ☐ Prompted relevant additional TESTING
  - ☐ Prompted relevant additional INTERVENTIONS
  - ☐ Helped me IDENTIFY new CRITICAL ILLNESS
  - ☐ Helped me IDENTIFY new SEPSIS
  - ☐ Other: \_\_\_\_\_
- 
- 12B. Were there any features that you found UNHELPFUL?
- ☐ YES (*if yes, direct to 12B*)
  - ☐ NO
- 

*If "Neutral", "Disagree", or "Strongly disagree" selected:*

- 12C. Select the reason(s) why the alert was UNHELPFUL. Select all that apply.
- ☐ Fired TOO EARLY ( BEFORE the patient worsened clinically)
  - ☐ Fired TOO LATE (AFTER I already knew the patient was septic)
  - ☐ Fired on a patient who REMAINED STABLE.
  - ☐ Fired for irrelevant or clinically insignificant abnormalities.
  - ☐ Fired for known abnormalities that did not require a change in management.
  - ☐ Prompted me to do testing or interventions that proved unnecessary.
  - ☐ I get too many alerts and did not take this alert seriously.
  - ☐ It was not a good use of my time or hospital resources.
  - ☐ Other: \_\_\_\_\_
- 
- 12D. Were there any features that you found HELPFUL?
- ☐ YES (*if yes, direct to 12A*)
  - ☐ NO
- 
13. Having seen the patient's clinical course evolve since the alert triggered, how would you NOW characterize the impact of the alert on your patient's care?
- ☐ DEFINITELY IMPROVED care
  - ☐ PROBABLY IMPROVED care
  - ☐ MAYBE improved care
  - ☐ PROBABLY DID NOT improve care
  - ☐ DEFINITELY DID NOT improve care
- 
14. What changes, if any, would you recommend to the EWS alert? \_\_\_\_\_
- 

*\*Carelign is an online signout tool widely used by clinicians at the study site.*
